# Supplementary figures and images for: Metformin generates profound alterations in systemic and tumor immunity with associated antitumor effects
Source: PubMed Central journal article supplement — J Immunother Cancer. 2021 Jul 6;9(7):e002773. doi: 10.1136/jitc-2021-002773 (PMC8261884; doi:10.1136/jitc-2021-002773), 2021-07-06

## SUPPLEMENTARY FIGURE S1

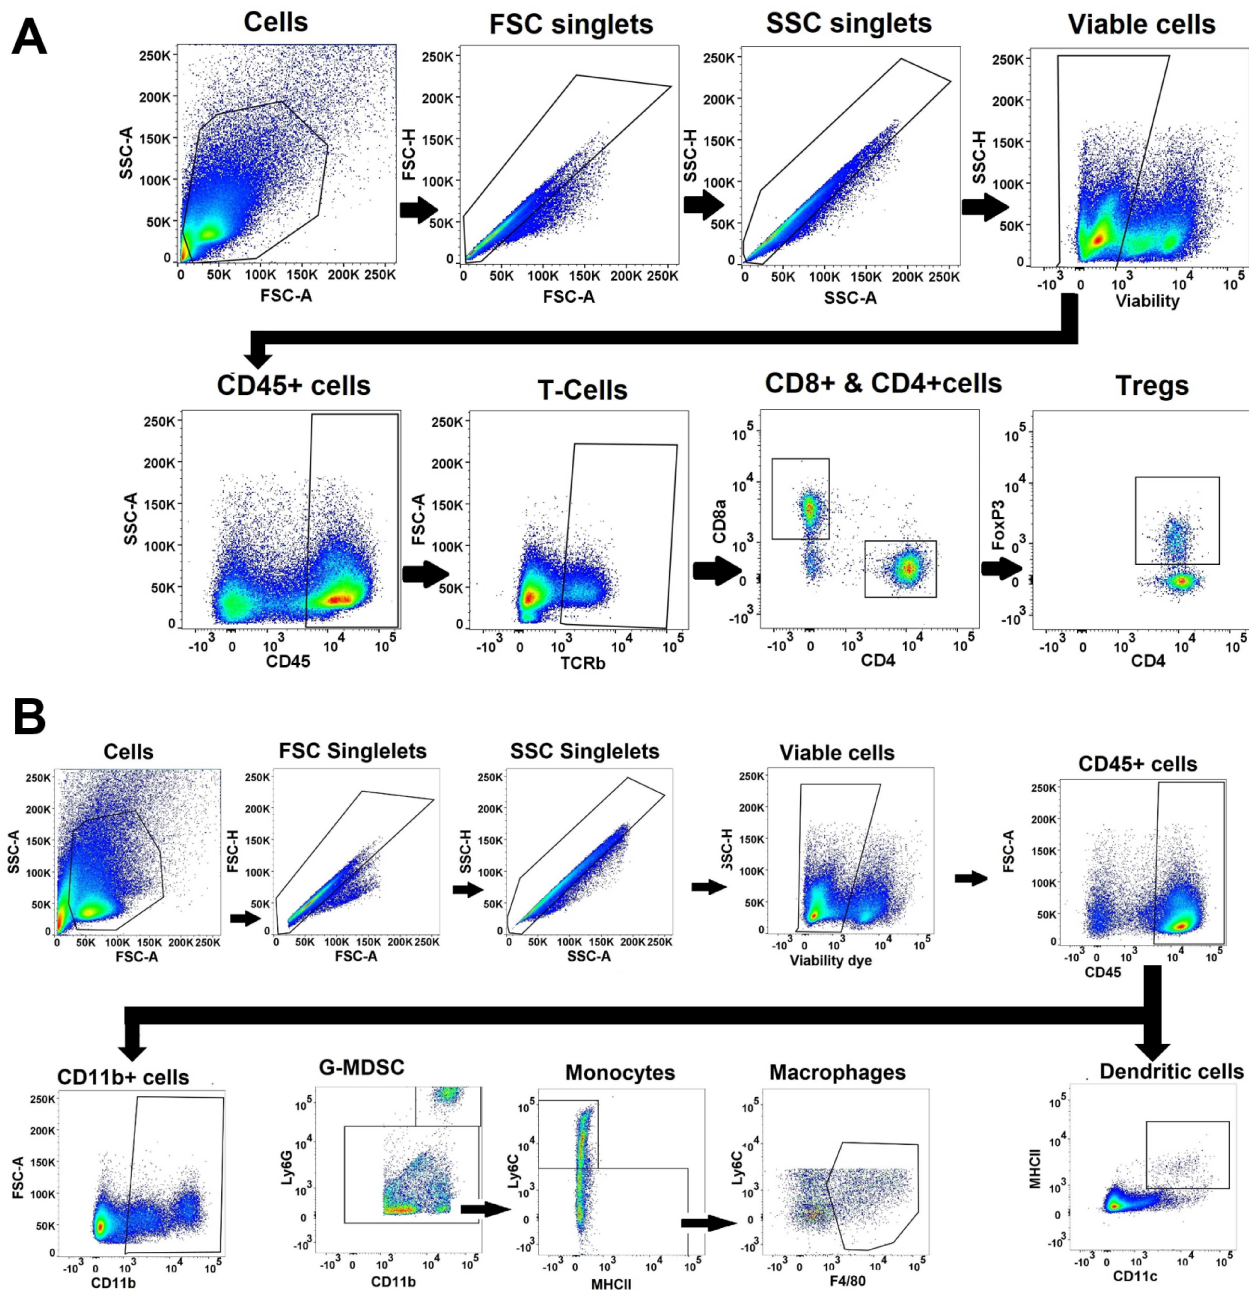

Supplement: jitc-2021-002773supp003.pdf [file jitc-2021-002773supp003.pdf]
